# Supplementary material
Source: publisher figshare collection journal article supplement (https://acs.figshare.com/ndownloader/files/15455876)
Supplement: Supplementary file 1 [file 15455876]

## Electronic Supplementary Information

# Low Molecular Weight Hydrogel for Super Efficient Separation of Small Organic Molecules Based on Size Effect

*Chuanjiang Jian,<sup>a‡</sup> Ning Tao,<sup>a‡</sup> Long Xu,<sup>b</sup> Miaochang Liu,<sup>a</sup> Xiaobo Huang,<sup>a</sup> Wenxia Gao<sup>a\*</sup> and Huayue Wu<sup>a</sup>*

a. College of Chemistry and Materials Engineering, Wenzhou University, Chaoyang New Street, Chashan Town, Wenzhou City, Zhejiang Province, 325027, China.

b. School of Material Science and Chemical Engineering, Ningbo University, 818 Fenghua Road, Jiangbei District, Ningbo City, Zhejiang Province, 315211, China.

‡These authors contributed equally.

### Corresponding Author

\*E-mail: wenxiag@wzu.edu.cn. Phone: +86-577-88368280

Electronic Supplementary Information has 15 pages and 15 figures.

### 1. Experimental section

3-Aminobenzene-boronic acid was obtained from Shanghai Darui Fine Chemicals Co. Ltd. Neopentyl glycol and lauroyl chloride were obtained from Shanghai Aladdin Chemistry Co. Ltd. *L*-Phenylalanine, glycylglycine, di-*t*butyl dicarbonate, *L*-glutamine, *N*-hydroxysuccinimide (NHS), dicyclohexylcarbodiimide (DCC), 4-dimethylaminopyridine (DMAP) and 2-(1H-benzotriazole-1-yl)-1,1,3,3-tetra-methyluroniumtetrafluoroborate (TBTU) was obtained from Shanghai Energy Chemistry Co. Ltd. All solvents and reagents were commercially available and directly used without purification.

**Synthesis of Gelator.** The synthesis process of gelator was showed in Scheme S1.

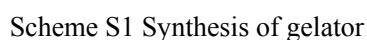

S2

added to the solution and heated to reflux for 10 h. The solvent was evaporated under vacuum and diethyl ether was added to the residue. The mixture was filtrated and compound **1** was collected.

**Synthesis of compound 2.** Compound **1** (21 mmol) was dissolved in dried CH<sub>2</sub>Cl<sub>2</sub> and triethylamine (6 mL), cooled in ice bath. Then lauroyl chloride (25.2 mmol) was added dropwise to the solution and stirred for overnight. The reaction mixture was filtered, and the filtrate was washed with saturated brine three times. The organic phase dried over anhydrous sodium sulfate. The residue was further purified by silica-gel chromatography (300-400 mesh) using uethyl acetate: petroleum ether (v/v=1:2) to obtain compound **2**.

**Synthesis of compound 3.** Compound **2** (1.2 mmol) was dissolved in the mixture of MeOH and THF (v/v=5:1, 6 mL). 2M NaOH (1.2 mL) was added dropwise and the mixture was stirred for 2h. The solvent was evaporated under vacuum. The residue was cooled in ice bath, and 6 M HCl (5 mL) was added dropwise. The residue was reprecipitated in ethyl acetate for three times to obtain compound **3**.

Compound **3**, white solid, mp: 97.6-98.1 °C. <sup>1</sup>H NMR (500 MHz, DMSO-*d*<sub>6</sub>, TMS) δ 0.84-0.87 (t, 3H, J=5.0 Hz), 1.09-1.29 (m, 16H), 1.34-1.40 (m, 2H), 2.01-2.03 (t, 2H, J=5 Hz), 2.80-2.85 (dd, 1H, J=5, 15 Hz), 3.03-3.06 (dd, 1H, J=10, 15 Hz), 4.40-4.44 (m, 1H), 7.17-7.27 (m, 5H), 8.07-8.09 (d, 1H, J=15 Hz), 12.63 (s, 1H). <sup>13</sup>C NMR (125 MHz, DMSO-*d*<sub>6</sub>, TMS) δ 13.9, 22.1, 25.1, 28.7, 31.3, 35.0, 36.7, 53.2, 126.3, 128.0, 129.0, 137.8, 172.1, 173.2.

**Synthesis of compound 5.** Compound **3** (694 mg, 2 mmol) and NHS (242 mg, 2.1 mmol) were dissolved in 30 mL of chloroform, and DCC (432 mg, 2.1 mmol) was added. After the mixture was stirred at room temperature for 12 h, the resulting solid was filtered, and the filtrate was concentrated by rotary evaporation. The crude product **4** was used without purification. Glycylglycine (264 mg, 2 mmol) and Na<sub>2</sub>CO<sub>3</sub> (424 mg, 4 mmol) were dissolved in 20 mL of water, the solution of the crude compound **4** (dissolved in 20 mL acetone) was added, and the resulting reaction mixture was stirred at room temperature overnight. The reaction mixture was concentrated by rotary evaporation, and then 50 mL of water was added. The resulting solid was filtered, and the filtrate was acidified to pH=3 and the resulting product was obtained by filtration. The residue was reprecipitated in ethyl acetate for three times to obtain compound **5**.

Compound **5**, white solid mp: 145.5-146.3 °C. <sup>1</sup>H NMR (500 MHz, DMSO-*d*<sub>6</sub>, TMS) δ 0.84-0.87 (t, 3H, J=5.0 Hz), 1.04-1.08 (m, 2H), 1.17-1.37 (m, 16H) 2.00-2.03 (m, 2H), 2.72-2.77 (dd, 1H, J=10, 15Hz), 3.02-3.05 (dd, 1H, J=10, 15Hz) 3.69-3.81 (m, 4H), 4.50-4.54 (m, 1H), 7.14-7.18 (m, 1H), 7.24-7.25 (m, 4H), 8.02-8.04 (d, 1H, J=5.0 Hz), 8.06-8.09 (t, 1H, J=5.0 Hz), 8.24-8.26 (t, 1H, J=5.0 Hz), 12.57 (s, 1H). <sup>13</sup>C NMR (125MHz, DMSO-*d*<sub>6</sub>, TMS) δ 13.9, 22.1, 25.1, 28.4, 28.7, 28.8, 28.9, 29.0, 31.3, 35.2, 37.4, 40.6, 41.8, 53.9, 126.1, 127.9, 129.1, 138.1, 169.0, 171.0, 171.7, 172.3. HRMS (ESI+) calcd for (C<sub>25</sub>H<sub>40</sub>N<sub>3</sub>O<sub>5</sub>)<sup>+</sup>: 462.2959; found: 462.2962.

**Synthesis of compound 7.** Compound **5** (922mg, 2 mmol) and NHS (242 mg, 2.1 mmol) were dissolved in 50 mL of chloroform, and DCC (432 mg, 2.1 mmol) was added. After the mixture was stirred for 12 h at room temperature, the resulting solid was filtered, and the filtrate was concentrated by rotary evaporation. The crude product **6** was used without purification. *L*-Glutamine (292mg, 2 mmol) and Na<sub>2</sub>CO<sub>3</sub> (424 mg, 4 mmol) were dissolved in 20 mL of water, the solution of the crude product **6** (dissolved in 20 mL acetone) was added, and the resulting reaction mixture was stirred at room temperature overnight. The reaction mixture was concentrated by rotary evaporation, and then 50 mL of water was added. The resulting solid was filtered off, and the filtrate was acidified to pH=3 and the resulting product was obtained by filtration, and the residue was reprecipitated in ethyl acetate for three times to obtain compound **7**. Compound **7**, white solid, mp: 196.6-197.5 °C. <sup>1</sup>H NMR (500 MHz, DMSO-*d*<sub>6</sub>, TMS) δ 0.84-0.87 (t, 3H, J=5.0 Hz), 1.04-1.07 (m, 2H), 1.16-1.32 (m, 16H), 1.75-1.79 (m, 1H), 1.88-1.94 (m, 1H), 2.01-2.07 (m, 4H), 2.74-2.79 (dd, 1H, J=10, 15Hz), 3.04-3.08 (dd, 1H, J=10, 15Hz), 3.71-3.77 (m, 4H), 3.92-3.95 (m, 1H), 4.51-4.55 (m, 1H), 6.67 (s, 1H), 7.14-7.17 (m, 1H), 7.21-7.26 (m, 4H), 7.38 (s, 1H), 7.62-7.64 (m, 1H), 8.21-8.31 (m, 2H), 8.47-8.49 (m, 1H). <sup>13</sup>C NMR (125MHz, DMSO-*d*<sub>6</sub>, TMS) δ 13.9, 22.1, 25.1, 28.4, 28.7, 28.8, 28.9, 29.0, 29.1, 31.3, 31.9, 35.2, 37.4, 42.1, 42.3, 53.6, 53.9, 126.0, 127.9, 129.1, 138.2, 167.7, 169.1, 172.0, 172.3, 173.9, 174.6. HRMS (ESI+) calcd for (C<sub>30</sub>H<sub>48</sub>N<sub>5</sub>O<sub>7</sub>)<sup>+</sup>: 590.3547; found: 590.3548.

**Synthesis of compound 8:** A mixture of 3-aminobenzeneboronic acid (2.74 g, 20 mmol), neopentyl glycol (2.29 g, 22 mmol), and chloroform (40 mL) was stirred at room temperature overnight. The organic phase was separated, dried over anhydrous sodium sulfate, and filtered. The solvent was evaporated under vacuum, and the residue was reprecipitated in isopropanol to obtain compound **8a**.

1, 4-dioxane (35 mL) and Et<sub>3</sub>N (11 mL) were added to a solution of glycylglycine (6.61 g, 50 mmol) in deionized water (35 mL), followed by adding Boc<sub>2</sub>O (12.5 mL, 55 mmol). The solution was stirred for 24 h at room temperature, and then a solution of deionized water (30 mL) and EtOAc (120 mL) were added. The aqueous phase was washed with EtOAc (120 mL) again, then it was acidified with citric acid solids to pH 2.5. The aqueous phase was extracted with EtOAc (100 mL) thrice. The organic phase was dried over anhydrous sodium sulfate, and evaporated under vacuum to obtain compound **8b**.

2-(1H-Benzotriazole-1-yl)-1, 1, 3, 3-tetra-methyluronium tetrafluoroborate (TBTU) (3.211 g, 10 mmol) was added to a mixture of compound **2** (2.320 g, 10 mmol) and triethylamine (2.8 mL, 20 mmol) in 40 mL ethyl acetate, then stirred at room temperature for 10 min. Afterward compound **1** (2.46 g, 12 mmol) was added to the solution and stirred at room temperature for 24 h. Then the mixture was filtered, and the solid was reprecipitated in dichloromethane/ethanol to obtain compound **8c**.

Compound **6c** (4.0 g, 9.5 mmol) was dissolved in CH<sub>2</sub>Cl<sub>2</sub> (7 mL). TFA (3.5 mL) was added to the solution and stirred for 4 h at room temperature. The solution was evaporated under vacuum to



remove CH<sub>2</sub>Cl<sub>2</sub> and TFA. Then acetonitrile was added, and the mixture was filtered. The solid was reprecipitated in ethyl acetate to obtain compound **8d**.

Compound **8b** (464mg, 2 mmol) and DCC (433mg, 2.1 mmol) were dissolved in dried DMF (30mL), then compound **8d** (670 mg, 2.1 mmol) and DMAP (256 mg, 2.1 mmol) was added. After the mixture was stirred at room temperature overnight, the resulting solid was filtered off, and the filtrate was concentrated by rotary evaporation. Then the residue was reprecipitated in ethylacetate for three times to obtain compound **8e**.

Compound **8e** (1.1 g, 2 mmol) was dissolved in CH<sub>2</sub>Cl<sub>2</sub> (20mL). TFA (1.0 mL) was added to the solution and stirred for 12 h at room temperature. The solution was evaporated under vacuum to remove CH<sub>2</sub>Cl<sub>2</sub> and TFA. Then acetonitrile was added, and the mixture was filtered. The solid was reprecipitated in ethyl acetate to obtain compound **8**.

Compound **8**, brown solid, mp:232.9-233.8 °C. <sup>1</sup>H NMR (500 MHz, DMSO-*d*<sub>6</sub>, TMS) δ 0.96 (s, 6H), 3.63 (s, 2H), 3.75 (s, 4H) 3.80-3.81 (d, 2H, J=5Hz), 3.87-3.89 (t, 4H, J=5Hz), 7.27-7.30 (m,1H), 7.37-7.39 (d, 1H), 7.69-7.70 (d, 1H), 7.92 (s, 1H), 8.07 (s, 2H), 8.24 (m, 1H), 8.34 (m, 1H), 8.67 (m, 1H), 9.87 (s, 1H). <sup>13</sup>C NMR (125 MHz, DMSO-*d*<sub>6</sub>, TMS) δ 21.3, 31.4, 42.0, 42.6, 71.4, 121.6, 124.5, 128.0, 128.5, 138.2, 166.3, 167.5, 168.8, 169.1. HRMS (ESI+) calcd for (C<sub>19</sub>H<sub>29</sub>BN<sub>5</sub>O<sub>6</sub>)<sup>+</sup>: 434.2220; found: 434.2209.

**Synthesis of compound 9.** Compound **7** (589mg, 1 mmol) and DCC (227 mg, 1.1 mmol) were dissolved in dried DMF (30mL), then compound **8** (476 mg, 1.1 mmol) and DMAP (134 mg, 1.1 mmol) was added. After the mixture was stirred at room temperature overnight, the resulting solid was filtered off, and the filtrate was concentrated by rotary evaporation. Then the residue was precipitated in ethyl acetate to obtain compound **9**.

**Synthesis of compound 10:** compound **9** (1.0 g, 1.0 mmol) was added to 1M HCl solution (50 mL), and stirred for 24 h at room temperature. Then the solid was filtered and the residue was reprecipitated in ethyl alcohol for three times to obtain compound **10**.

Compound **10**, white solid, mp: 252.2-253.1 °C. <sup>1</sup>H NMR (500 MHz, DMSO-*d*<sub>6</sub>, TMS) δ 0.84-0.87 (t, 3H, J=5.0 Hz), 1.04-1.07 (m, 2H), 1.16-1.35 (m, 16H), 1.73-1.80 (m, 1H), 1.90-1.97 (m, 1H), 2.00-2.03 (m, 2H), 2.10-2.13 (t, 1H, J=5.0Hz), 2.25-2.29 (m, 1H), 2.72-2.77 (dd, 1H, J=10, 15Hz), 3.03-3.06 (dd, 1H, J=10, 15Hz), 3.75-3.79 (m, 10H), 3.88-3.89 (d, 2H, J=5.0Hz), 4.22-4.32 (m, 1H), 4.51-4.55 (m, 1H), 6.78 (s, 1H), 7.14-7.18 (m, 1H), 7.22-7.28 (m, 6H), 7.48-7.49 (d, 1H, 5Hz), 7.70-7.71 (d, 1H, 5Hz), 7.85 (s, 1H), 8.00-8.10 (m, 6H), 8.18-8.21 (m, 3H), 8.26-8.28 (m, 1H), 9.77 (s, 1H). HRMS (ESI+) calcd for (C<sub>44</sub>H<sub>66</sub>BN<sub>10</sub>O<sub>7</sub>)<sup>+</sup>: 937.4945; found: 937.4957

## 2. Gel preparation

The gelators of compound **10** in PBS (pH 7.4) were placed in closed glass vials and heated to form solutions. The solutions were cooled to room temperature to obtain gels. The critical gelation

concentration (CGC) was determined by measuring the minimum amount of gelator to form a stable gel at 25 °C. The xerogels for SEM and TEM were dried at room temperature in vacuum.

### 3. Preparation of filtration and separation devices of LMWGs

Taking a glass funnel, sealed the bottom of the tube using a small amount of absorbent cotton, then 1 mL heated solution of gelator in the phosphate buffer solution with different concentration was quickly moved to the glass funnel, the solution converted to gel soon at the room temperature, this simple filtration and separation devices was completed. A series of solutions of different compounds with different concentrations were prepared for evaluating the filtration and separation devices of LMWGs. 100 mL each solution was slowly add to the funnel with LMWGs as filling. The concentration of these solutions were detected before and after filtering material respectively.

### 4. Detection of compounds used for separation

The compounds used for separation were measured using HPLC, it was taken on Agilent 1120 type liquid instrument using inertsil ods-sp C18 chromatographic column. DOX·HCl was detected at 28 °C with the wavelength of 495 nm, the mobile phase was methanol: acetate buffer (pH 3.4) = 55: 45. The phenformin was detected at 30 °C with the wavelength of 234 nm, the mobile phase was methanol: phosphate buffer (pH 3.5) = 25: 75.

The cyanidin chloride was detected at 25 °C with the wavelength of 520 nm, the mobile phase was acetonitrile: water: phosphate = 12: 84: 4.

Rhodamine 19 perchlorate was measured using ultraviolet spectrophotometer with the wavelength of 554 nm.

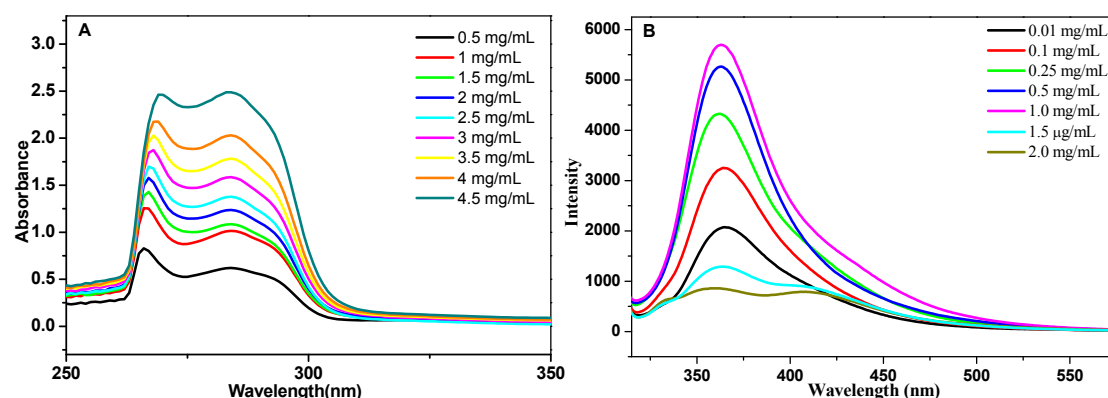

**Figure S1.** UV spectra (A) and fluorescence spectra (B) of gelator with different concentrations.

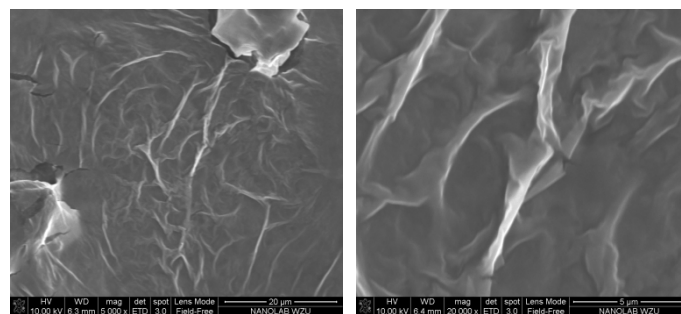

**Figure S2.** SEM images of the gel with the concentration of 15 mg/mL.

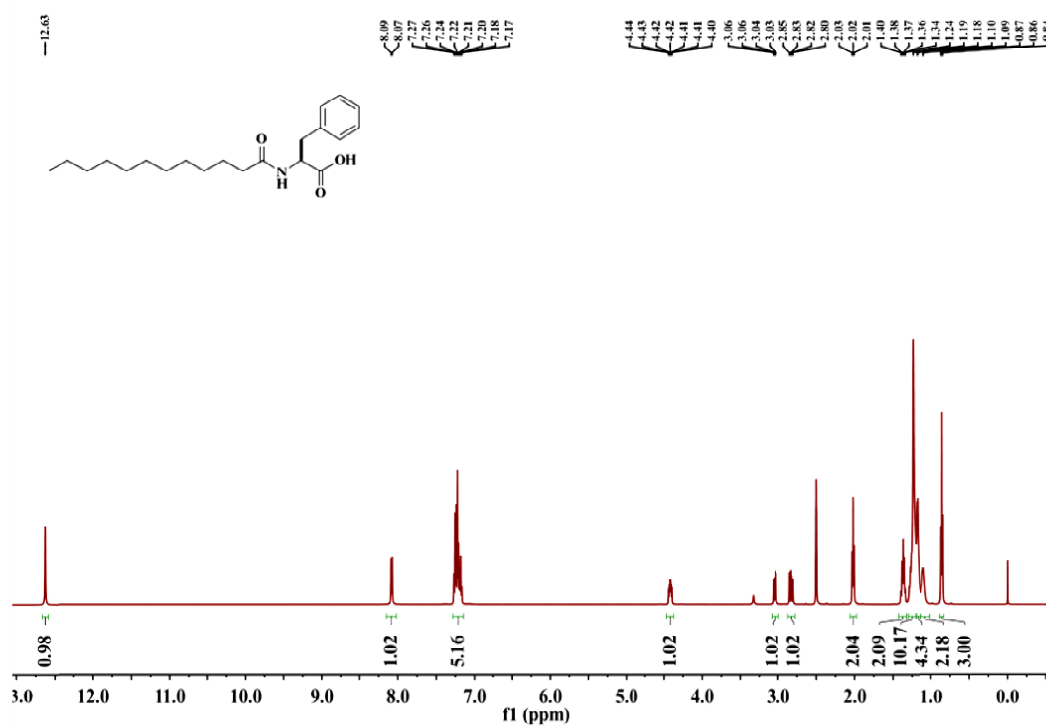

**Figure S3.** The <sup>1</sup>H NMR spectrum of compound 3 (DMSO-*d*<sub>6</sub>, 500MHz)

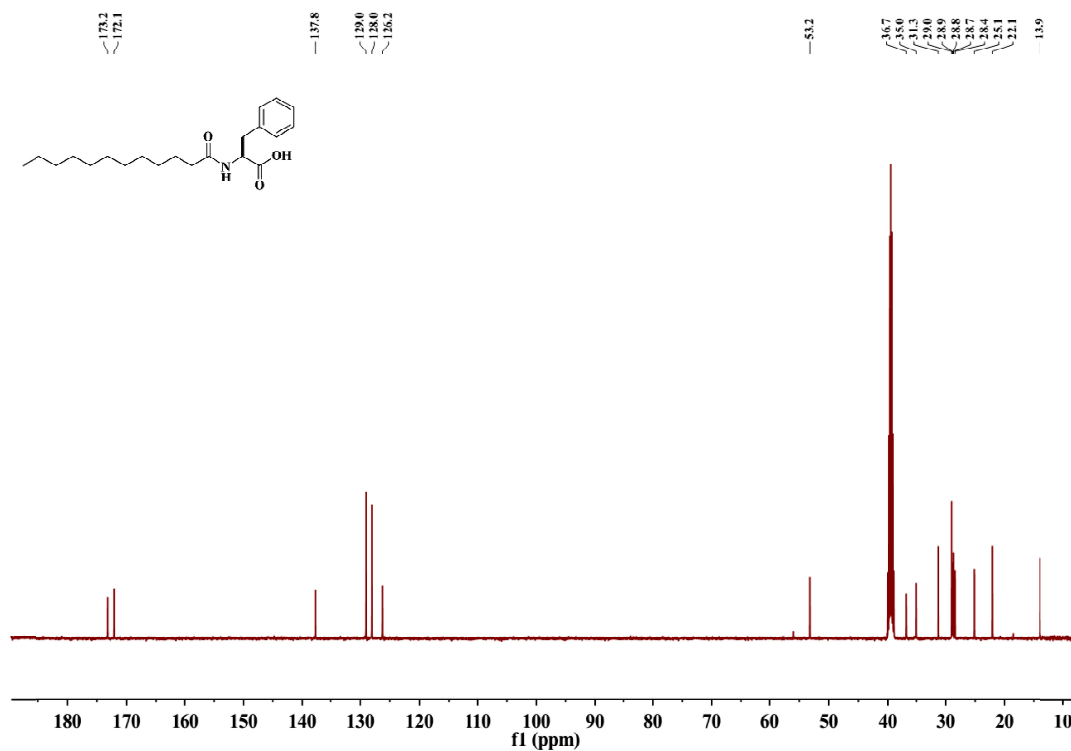

Figure S4  $^{13}\text{C}$  NMR spectrum of compound 3 ( $\text{DMSO-}d_6$ , 125 MHz)

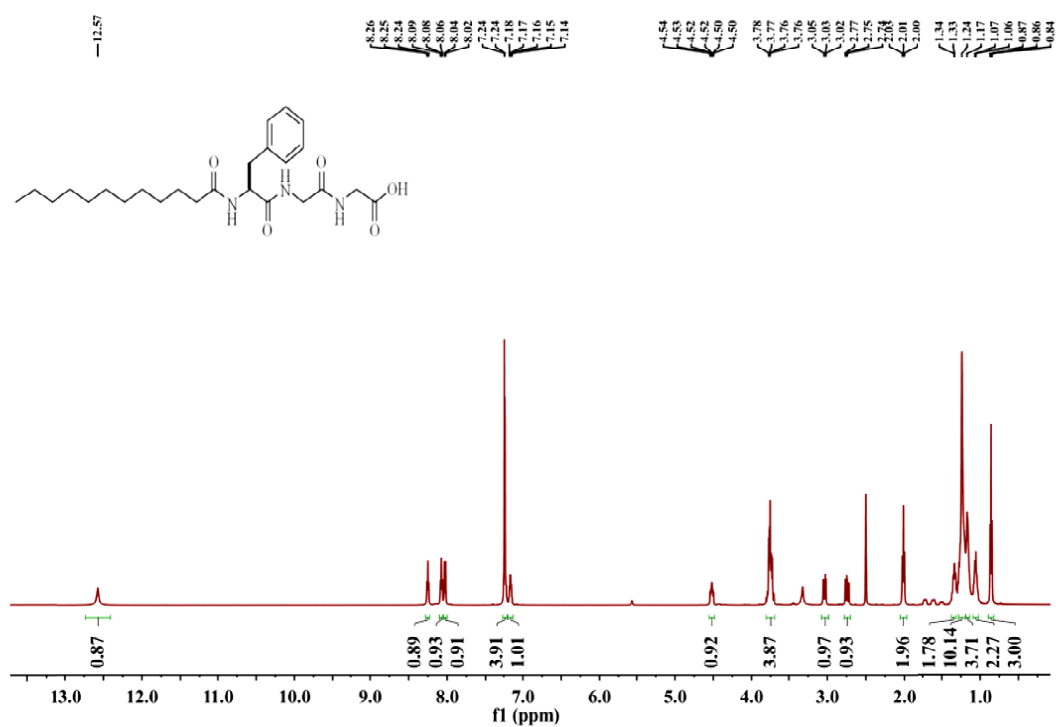

Figure S5. The  $^1\text{H}$  NMR spectrum of compound 5 ( $\text{DMSO-}d_6$ , 500MHz)

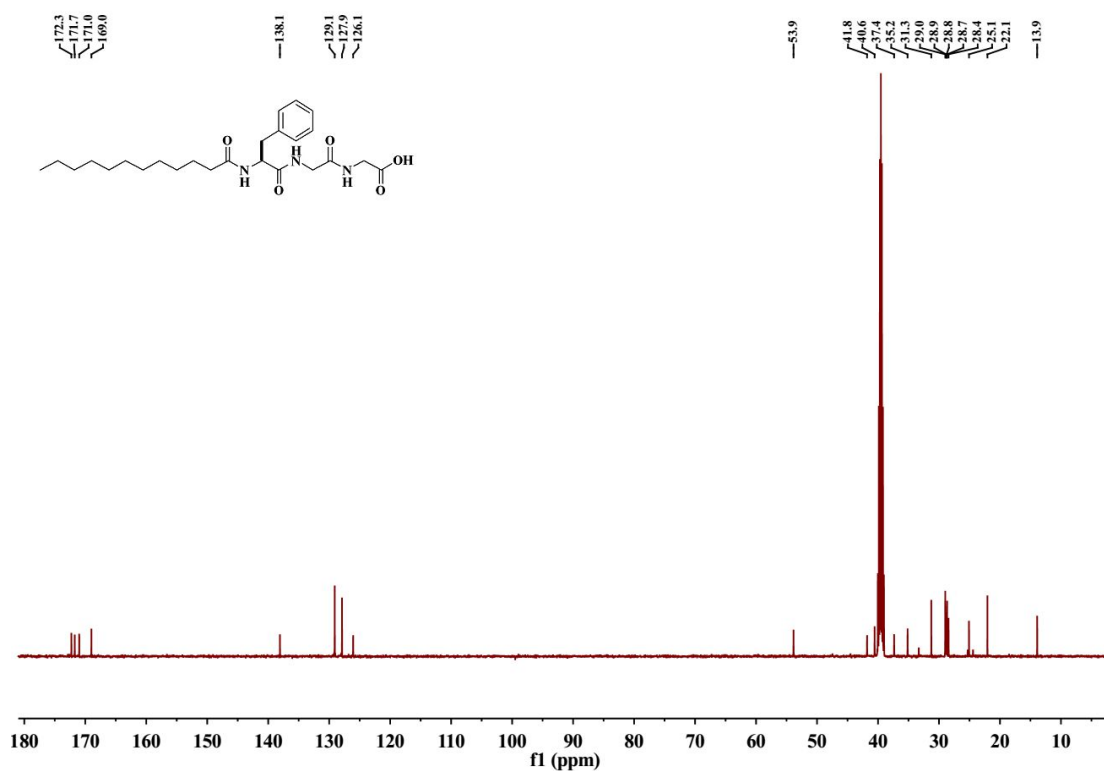

Figure S6 <sup>13</sup>C NMR spectrum of compound 5 (DMSO-*d*<sub>6</sub>, 125 MHz)

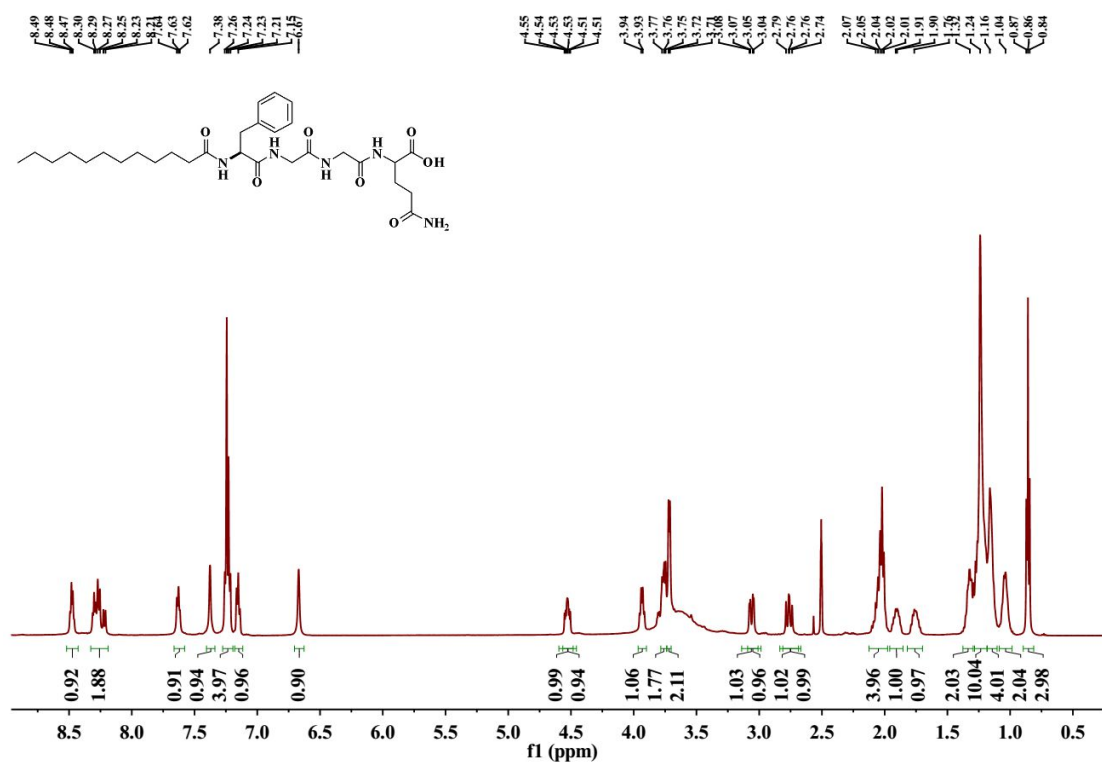

Figure S7. The <sup>1</sup>H NMR spectrum of compound 7 (DMSO-*d*<sub>6</sub>, 500MHz)

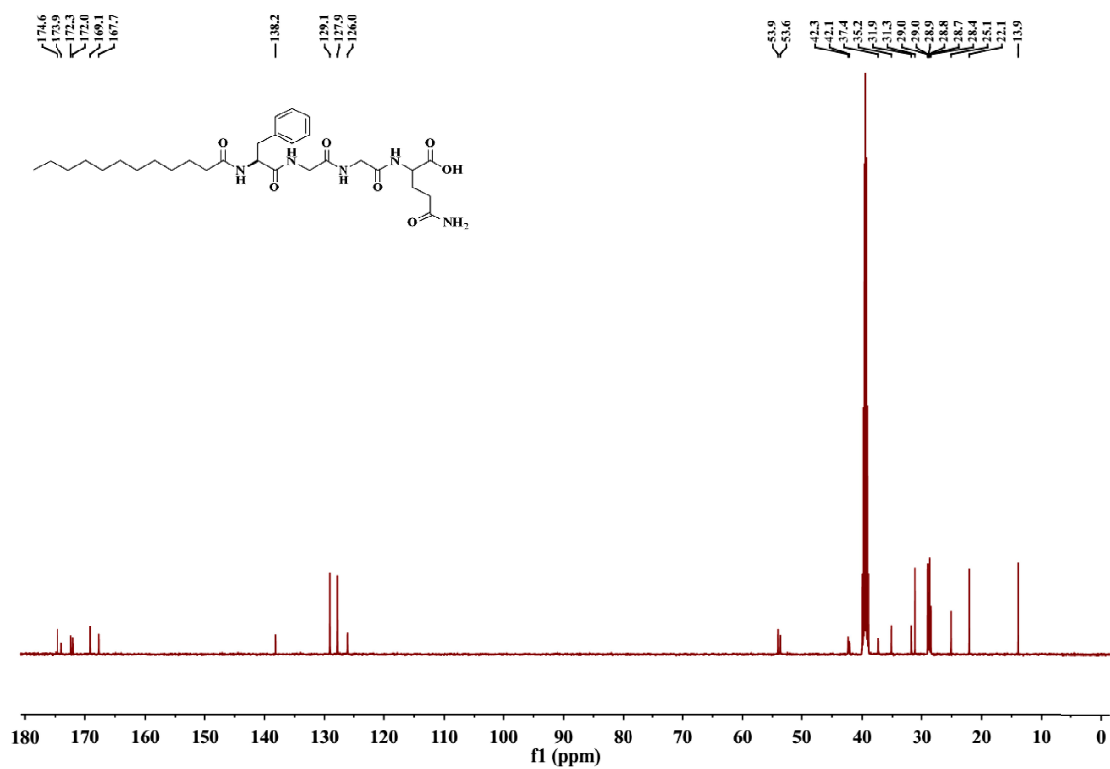

Figure S8. <sup>13</sup>C NMR spectrum of compound 7 (DMSO-*d*<sub>6</sub>, 125 MHz)

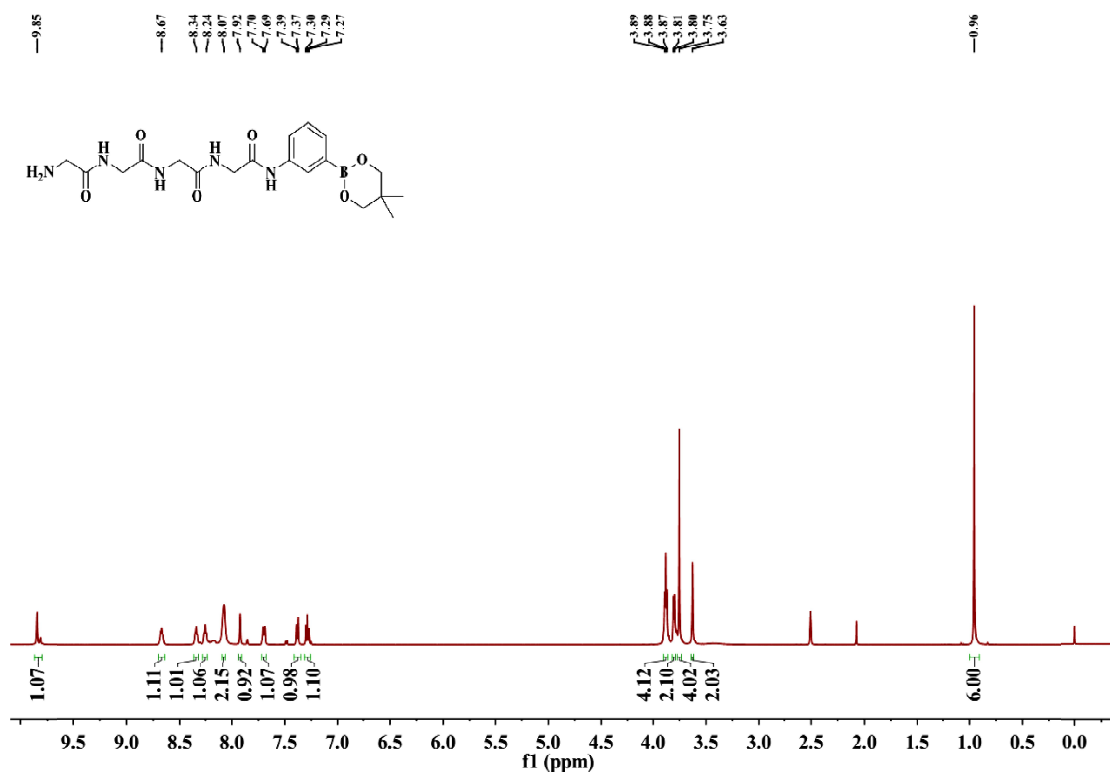

Figure S9. The <sup>1</sup>H NMR spectrum of compound 8 (DMSO-*d*<sub>6</sub>, 500MHz)

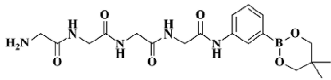[illegible]

S11

## Generic Display Report

### Analysis Info

Analysis Name D:\Data\2016070401.d  
Method tune\_150-800.m  
Sample Name 2016070401  
Comment

Acquisition Date 7/4/2016 5:51:31 PM

Operator BDAL@DE  
Instrument micrOTOF-Q II

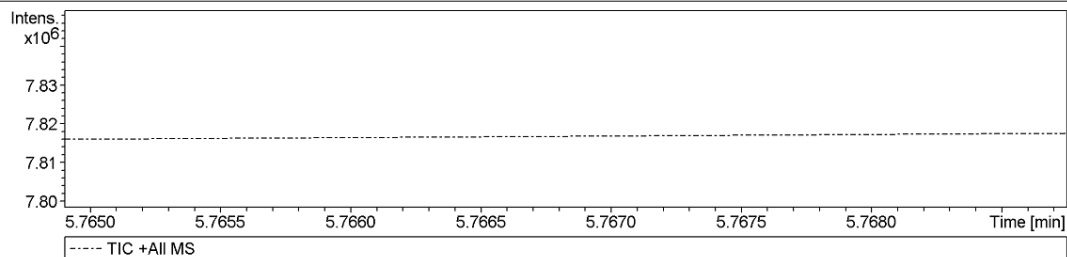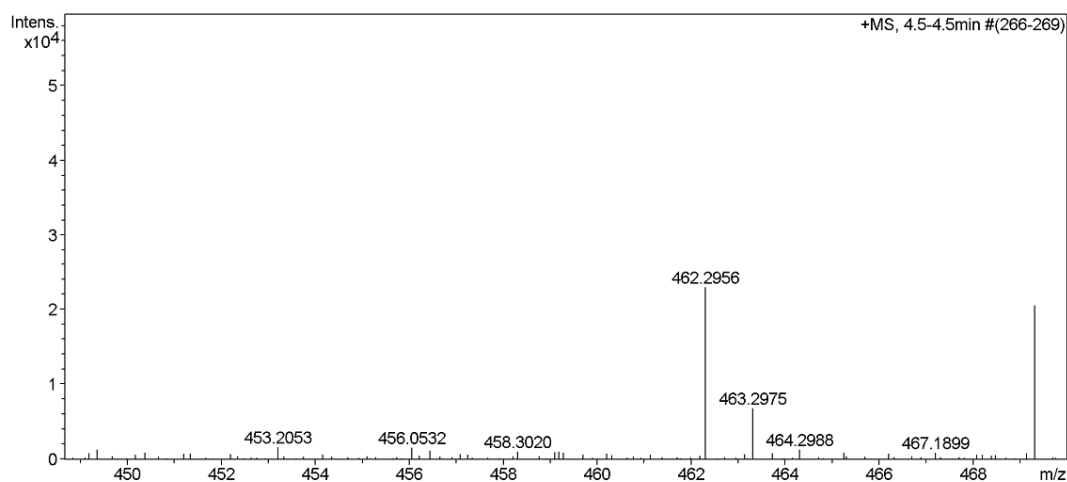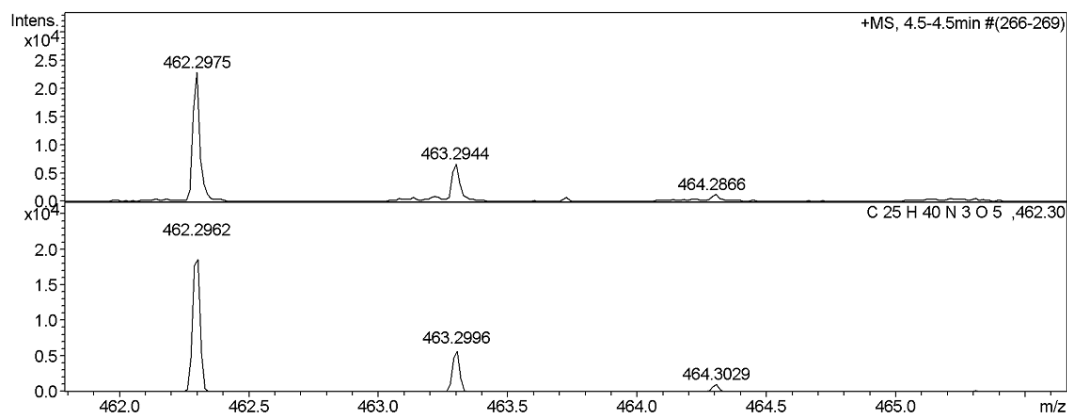

Figure S12. Mass spectra of compound 5



## Generic Display Report

### Analysis Info

Analysis Name

Method tune\_150-800.m

Sample Name

Comment

Operator

Instrument

BDAL@DE

micrOTOF-Q II

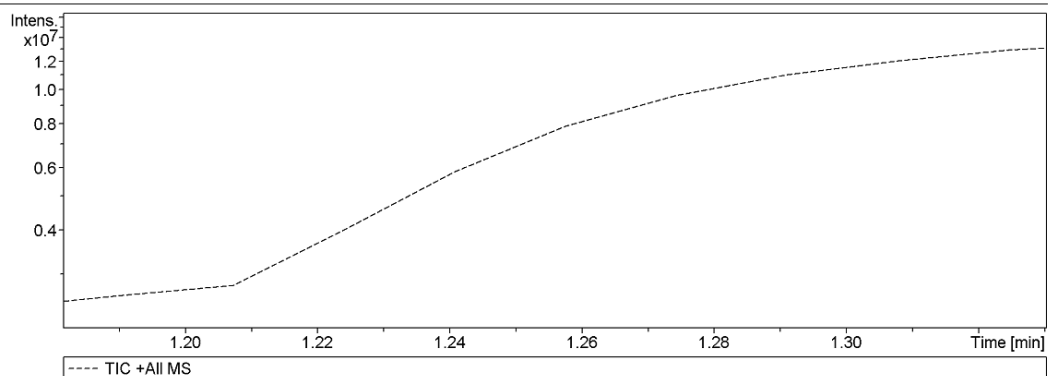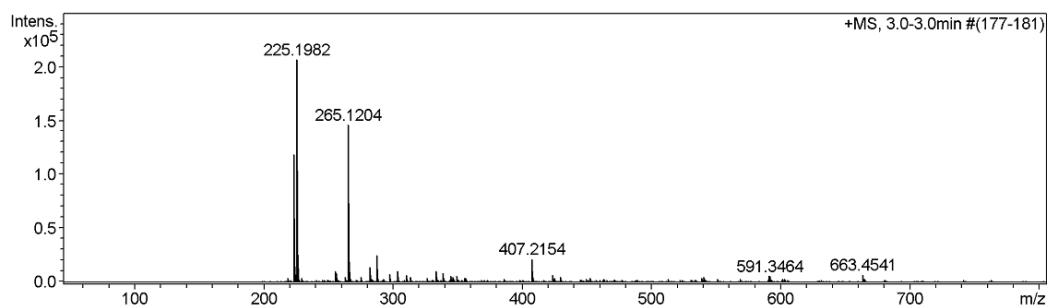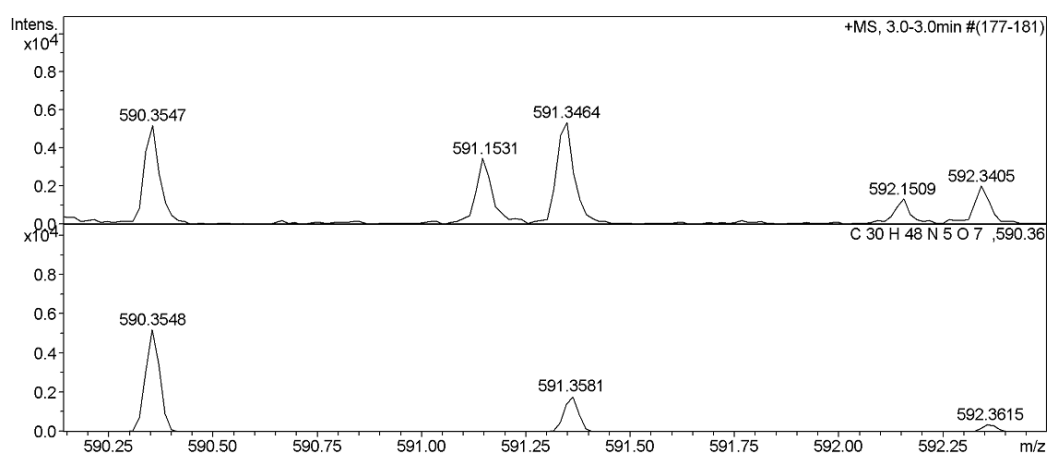

Figure S13. Mass spectra of compound 7

## Generic Display Report

### Analysis Info

Analysis Name D:\Data\2016070401.d  
Method tune\_150-800.m  
Sample Name 2016070401  
Comment

Acquisition Date 7/4/2016 5:51:31 PM

Operator BDAL@DE  
Instrument micrOTOF-Q II

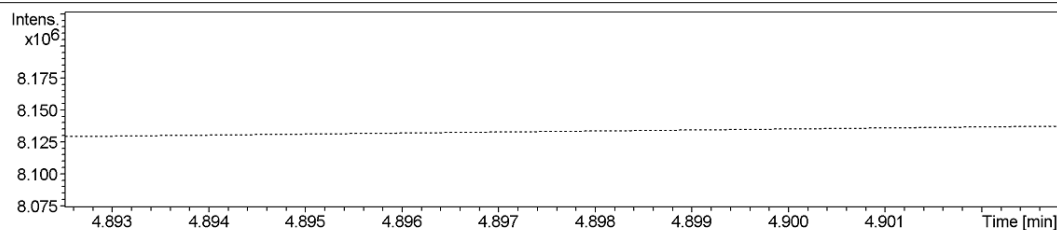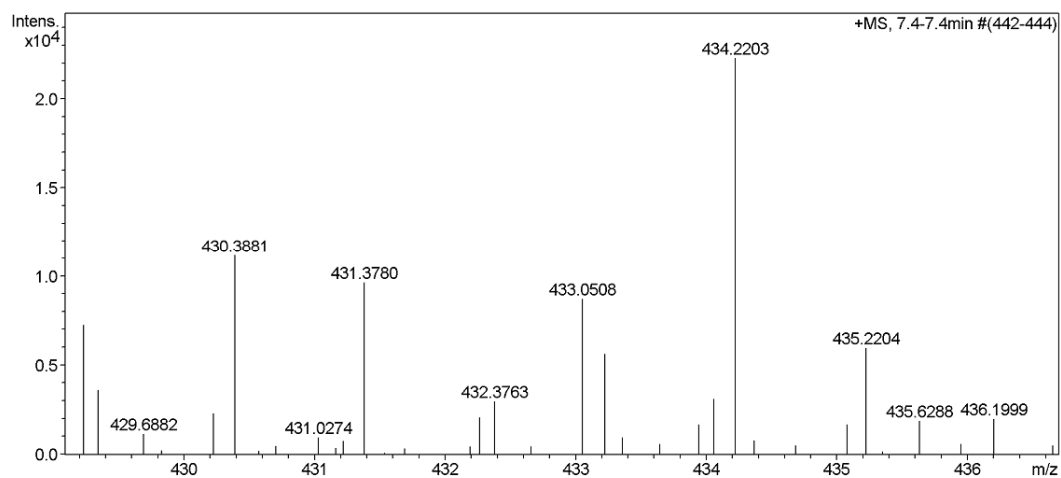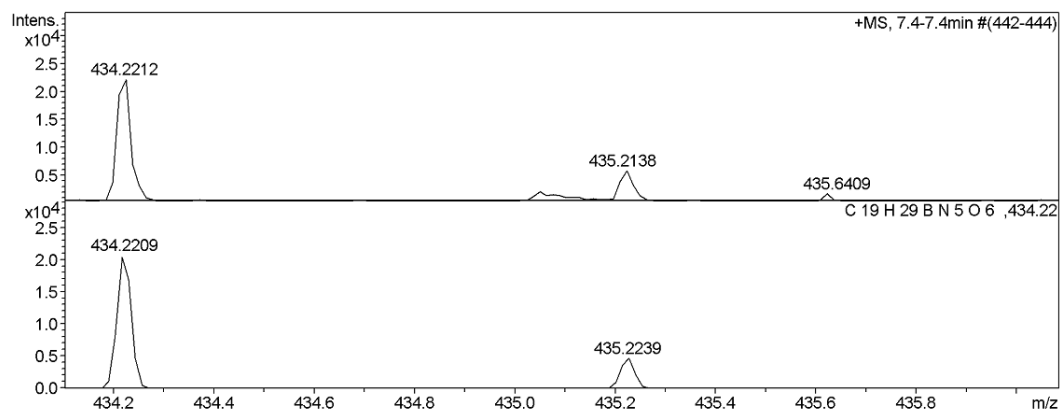

Figure S14. Mass spectra of compound 8

## Generic Display Report

### Analysis Info

Analysis Name  
Method tune\_300-1500\_pos.m  
Sample Name  
Comment

Operator BDAL@DE  
Instrument micrOTOF-Q II

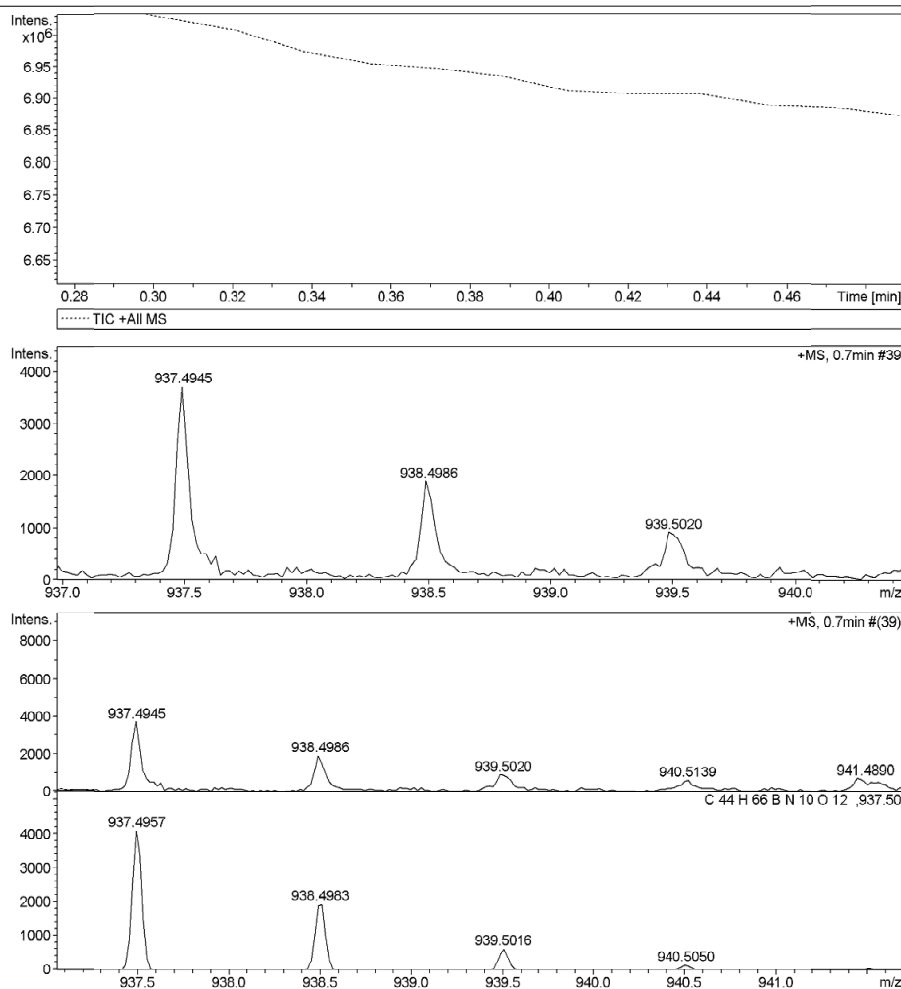

Bruker Compass DataAnalysis 4.0

printed: 4/6/2016 3:06:35 PM

Page 1 of 1

**Figure S15. Mass spectra of compound 10**
